# Supplementary material for: Changes in parental smoking during pregnancy and risks of adverse birth outcomes and childhood overweight in Europe and North America: An individual participant data meta-analysis of 229,000 singleton births
Source: PubMed Central journal article supplement (PMC7433860; doi:10.1371/journal.pmed.1003182), 2020-08-18
Supplement: pmed.1003182.s004.pdf [file pmed.1003182.s004.pdf]

**S1 Fig. Maternal continued smoking with risks of small size for gestational age assessed by 2-stage random effects models<sup>a</sup>**

**Continued smoking vs non-smoking**

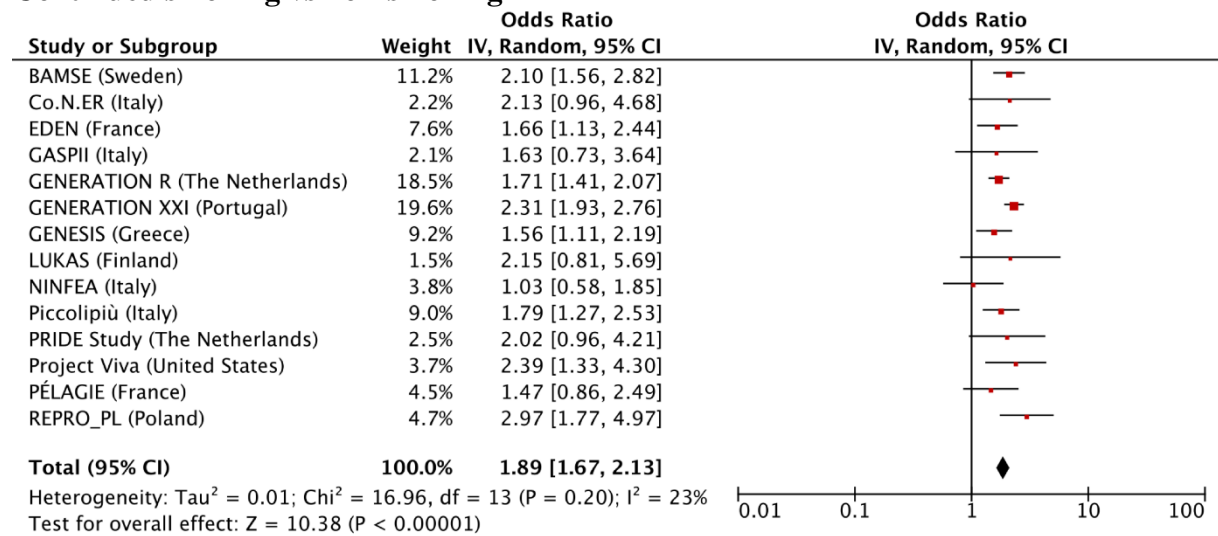

<sup>a</sup>Values are odds ratios (95% confidence intervals) per cohort and pooled from binary logistic regression models that reflect the risk of small size for gestational age for continued smoking compared to non-smoking. Models are adjusted for maternal age, educational level, parity, pre- or early pregnancy body mass index, alcohol consumption during pregnancy and paternal smoking. Analysis was restricted to cohorts with information on first trimester only smoking. The heterogeneity between the estimates of each cohort was 23% (95% CI 0%-65%).
