# Supplementary material for: Changes in parental smoking during pregnancy and risks of adverse birth outcomes and childhood overweight in Europe and North America: An individual participant data meta-analysis of 229,000 singleton births
Source: PubMed Central journal article supplement (PMC7433860; doi:10.1371/journal.pmed.1003182), 2020-08-18
Supplement: pmed.1003182.s005.pdf [file pmed.1003182.s005.pdf]

**S1 Table. Cohort-specific methods of data collection for parental smoking, birth outcomes and childhood BMI**

| <b>Cohort name, number of participants, birth years (country)</b> | <b>Maternal smoking</b> | <b>Paternal smoking</b> | <b>Gestational age at birth</b>                  | <b>Birth weight</b>             | <b>Childhood weight and height</b>                               |
|-------------------------------------------------------------------|-------------------------|-------------------------|--------------------------------------------------|---------------------------------|------------------------------------------------------------------|
| ABCD, n=7,324, 2003-2004 (The Netherlands)                        | Self-reported           | NA                      | Clinical records                                 | Clinical records                | Measured                                                         |
| ALSPAC, n=12,148, 1991-1992 (United Kingdom)                      | Self-reported           | Self-reported           | Clinical records                                 | Measured                        | Measured                                                         |
| BAMSE, n=4,057, 1994-1996 (Sweden)                                | Self-reported           | Self-reported           | Medical Birth Registry                           | Medical Birth Registry          | Measured                                                         |
| BIB, n=1,641, 2007-2010 (United Kingdom)                          | Self-reported           | NA                      | Clinical records                                 | Clinical records                | NA                                                               |
| Co.N.ER, n=641, 2004-2005 (Italy)                                 | Self-reported           | Self-reported           | Self-reported                                    | Clinical records                | Self-reported                                                    |
| DNBC, n=71,710, 1996-2002 (Denmark)                               | Self-reported           | Self-reported           | Self-reported or National Medical Birth Registry | National Medical Birth Registry | Self-reported or measured                                        |
| EDEN, n=1,880, 2003-2005 (France)                                 | Self-reported           | Self-reported           | Clinical records                                 | Clinical records                | Measured or clinical records                                     |
| FCOU, n=4,003, 1993-1996 (Ukraine)                                | Self-reported           | Self-reported           | NA                                               | Clinical records                | Clinical records                                                 |
| GASPII, n=680 (Italy)                                             | Self-reported           | Self-reported           | Clinical records                                 | Clinical records                | Measured                                                         |
| GENERATION R, 7,934, 2002-2006 (The Netherlands)                  | Self-reported           | Self-reported           | Clinical records                                 | Clinical records                | Measured                                                         |
| GENERATION XXI, n=7,541, 2005-2006 (Portugal)                     | Self-reported           | NA                      | Clinical records                                 | Clinical records                | Measured                                                         |
| GENESIS, n=2,261, 2003-2004 (Greece)                              | Self-reported           | NA                      | Clinical records                                 | Clinical records                | Measured                                                         |
| GINIplus, n=2,086, 1995-1998 (Germany)                            | Self-reported           | NA                      | NA                                               | NA                              | Clinical records at 4y, measured and self-reported at 10 and 15y |
| HUMIS, n=986, 2002-2009 (Norway)                                  | Self-reported           | NA                      | Clinical records                                 | Clinical records                | Self-reported                                                    |
| INMA, n=2,406, 1997-2008 (Spain)                                  | Self-reported           | Self-reported           | Clinical records                                 | Clinical records                | Measured                                                         |
| KOALA, n=2,800, 2000-2002 (The Netherlands)                       | Self-reported           | NA                      | Clinical records                                 | Clinical records                | Reported                                                         |
| LISAplus, n=1,965, 1997-1999 (Germany)                            | Self-reported           | Self-reported           | NA                                               | NA                              | Clinical records at 4y, measured and self-reported at 10 and 15y |
| LUKAS, n=441, 2002-2005 (Finland)                                 | Self-reported           | NA                      | NA                                               | Clinical records                | Self-reported                                                    |
| MoBa, n=80,116, 1999-2009 (Norway)                                | Self-reported           | Self-reported           | Clinical records                                 | Clinical records                | Self-reported                                                    |

|                                                   |               |               |                                   |                                   |               |
|---------------------------------------------------|---------------|---------------|-----------------------------------|-----------------------------------|---------------|
| NINFEA, n=2,259, 2005-2010 (Italy)                | Self-reported | NA            | Self-reported                     | Self-reported                     | Self-reported |
| PÉLAGIE, n=1,494, 2002-2005 (France)              | Self-reported | Self-reported | Clinical records                  | Clinical records                  | NA            |
| Piccolipiù, n=3,292, 2011-2015 (Italy)            | Self-reported | Self-reported | Clinical records                  | Clinical records                  | NA            |
| PRIDE Study, n=1,616, 2011-2015 (The Netherlands) | Self-reported | NA            | Self-reported or clinical records | Self-reported or clinical records | NA            |
| Project Viva, n=2,001, 1999-2002 (United States)  | Self-reported | NA            | Self-reported or clinical records | Clinical records                  | Measured      |
| REPRO_PL, n=1,434, 2007-2011 (Poland)             | Self-reported | Self-reported | Clinical records                  | Clinical records                  | Measured      |
| RHEA, n=651, 2007-2008 (Greece)                   | Self-reported | Self-reported | Self-reported or clinical records | Clinical records                  | NA            |
| SCOPE BASELINE, n=1,216, 2009-2011 (Ireland)      | Self-reported | Self-reported | Measured                          | Measured                          | NA            |
| SWS, n=2,716, 1998-2007 (United Kingdom)          | Self-reported | NA            | Measured                          | Clinical records                  | Measured      |

---

NA: Not available or not applicable. BMI, body mass index.
