# Supplementary material for: Changes in parental smoking during pregnancy and risks of adverse birth outcomes and childhood overweight in Europe and North America: An individual participant data meta-analysis of 229,000 singleton births
Source: PubMed Central journal article supplement (PMC7433860; doi:10.1371/journal.pmed.1003182), 2020-08-18
Supplement: pmed.1003182.s006.pdf [file pmed.1003182.s006.pdf]

**S2 Table. Cohort-specific description of available covariates**

| Cohort name,<br>number of<br>participants | Maternal<br>age (years) | Maternal educational level |                 |                 |               | Maternal parity |                 | Maternal<br>pre- or early<br>pregnancy<br>BMI (kg/m <sup>2</sup> ) | Paternal<br>BMI<br>(kg/m <sup>2</sup> ) | Maternal alcohol<br>consumption |                  |
|-------------------------------------------|-------------------------|----------------------------|-----------------|-----------------|---------------|-----------------|-----------------|--------------------------------------------------------------------|-----------------------------------------|---------------------------------|------------------|
|                                           |                         | Low                        | Medium          | High            | Missing       | Nulliparous     | Missing         |                                                                    |                                         | Yes                             | Missing          |
| ABCD, n=7,324                             | 31.0<br>(20.0, 40.0)    | 1547<br>(21.1)             | 2799<br>(38.2)  | 2916<br>(39.8)  | 62<br>(0.8)   | 4101<br>(56.0)  | NA              | 22.2<br>(17.9, 33.8)                                               | NA                                      | 1562<br>(21.3)                  | 4<br>(0.1)       |
| ALSPAC,<br>n=12,148                       | 28.0<br>(19.0, 38.0)    | 7132<br>(58.7)             | 2547<br>(21.0)  | 1506<br>(12.4)  | 963<br>(7.9)  | 5269<br>(43.4)  | 217<br>(1.8)    | 22.3<br>(17.9, 33.9)                                               | 24.9<br>(19.8, 32.7)                    | NA                              | 12148<br>(100.0) |
| BAMSE, n=4,057                            | 30.0<br>(22.0, 40.0)    | 1377<br>(33.9)             | 999<br>(24.6)   | 1655<br>(40.8)  | 26<br>(0.6)   | 2208<br>(54.4)  | 48<br>(1.2)     | 22.4<br>(18.2, 31.6)                                               | NA                                      | NA                              | 4057<br>(100.0)  |
| BIB, n=1,641                              | 27.0<br>(17.0, 39.0)    | 412<br>(25.1)              | 609<br>(37.1)   | 614<br>(37.4)   | 6<br>(0.4)    | 624<br>(38.0)   | 24<br>(1.5)     | 24.7<br>(17.8, 39.8)                                               | NA                                      | 308<br>(18.8)                   | 7<br>(0.4)       |
| Co.N.ER, n=641                            | 33.7<br>(24.5, 41.9)    | 116<br>(18.1)              | 284<br>(44.3)   | 240<br>(37.4)   | 1<br>(0.2)    | 283<br>(44.1)   | 2<br>(0.3)      | 21.1<br>(17.6, 30.5)                                               | 24.8<br>(20.0, 31.1)                    | 287<br>(44.8)                   | 3<br>(0.5)       |
| DNBC, n=71,710                            | 30.3<br>(22.5, 39.2)    | 6625<br>(9.2)              | 27085<br>(37.8) | 37742<br>(52.6) | 258<br>(0.4)  | 34959<br>(48.8) | 47<br>(0.1)     | 22.7<br>(18.0, 34.5)                                               | 24.8<br>(20.0, 32.4)                    | 31754<br>(44.3)                 | 79<br>(0.1)      |
| EDEN, n=1,880                             | 29.4<br>(20.3, 39.6)    | 531<br>(28.2)              | 334<br>(17.8)   | 1005<br>(53.5)  | 10<br>(0.5)   | 1039<br>(55.3)  | 3<br>(0.2)      | 22.1<br>(17.4, 34.6)                                               | 24.6<br>(19.3, 33.6)                    | 944<br>(50.2)                   | 101<br>(5.4)     |
| FCOU, n=4,003                             | 23.0<br>(17.0, 36.0)    | 242<br>(6.0)               | 2554<br>(63.8)  | 945<br>(23.6)   | 262<br>(6.5)  | 2594<br>(64.8)  | 307<br>(7.7)    | 21.7<br>(17.3, 31.6)                                               | 23.9<br>(19.6, 31.0)                    | 837<br>(20.9)                   | 193<br>(4.8)     |
| GASPII, n=680                             | 33.0<br>(22.0, 41.0)    | 96<br>(14.1)               | 341<br>(50.1)   | 243<br>(35.7)   | NA            | 399<br>(58.7)   | NA              | 21.3<br>(17.6, 31.2)                                               | 25.0<br>(20.7, 32.9)                    | 240<br>(35.3)                   | 3<br>(0.4)       |
| GENERATION<br>R, n=7,934                  | 30.4<br>(19.3, 39.3)    | 821<br>(10.3)              | 3446<br>(43.4)  | 3280<br>(41.3)  | 387<br>(4.9)  | 4440<br>(56.0)  | 42<br>(0.5)     | 22.8<br>(18.0, 35.1)                                               | 24.9<br>(19.5, 33.0)                    | 3642<br>(45.9)                  | 700<br>(8.8)     |
| GENERATION<br>XXI, n=7,541                | 29.0<br>(18.0, 40.0)    | 2473<br>(32.8)             | 3282<br>(43.5)  | 1753<br>(23.2)  | 33<br>(0.4)   | 4213<br>(55.9)  | 95<br>(1.3)     | 22.9<br>(18.1, 34.7)                                               | NA                                      | 847<br>(11.2)                   | 364<br>(4.8)     |
| GENESIS,<br>n=2,261                       | 30.4<br>(21.2, 39.2)    | 98<br>(4.3)                | 1135<br>(50.2)  | 947<br>(41.9)   | 81<br>(3.6)   | 1122<br>(49.6)  | NA              | 21.9<br>(17.6, 31.1)                                               | NA                                      | 108<br>(4.8)                    | NA               |
| GINIplus,<br>n=2,086                      | 31.0<br>(24.0, 40.0)    | 243<br>(11.6)              | 874<br>(41.9)   | 964<br>(46.2)   | 5<br>(0.2)    | NA              | 2086<br>(100.0) | 22.1<br>(18.0, 31.6)                                               | NA                                      | NA                              | 2086<br>(100.0)  |
| HUMIS, n=986                              | 30.0<br>(22.0, 39.0)    | 99<br>(10.0)               | 166<br>(16.8)   | 601<br>(61.0)   | 120<br>(12.2) | 425<br>(43.1)   | NA              | 23.4<br>(18.4, 35.1)                                               | 25.7<br>(21.0, 33.3)                    | 72<br>(7.3)                     | 400<br>(40.6)    |
| INMA, n=2,406                             | 30.0<br>(21.0, 39.0)    | 750<br>(31.2)              | 913<br>(37.9)   | 713<br>(29.6)   | 30<br>(1.2)   | 1305<br>(54.2)  | 2<br>(0.1)      | 22.5<br>(18.0, 34.9)                                               | 25.3<br>(20.3, 33.2)                    | 219<br>(9.1)                    | 29<br>(1.2)      |
| KOALA, n=2,800                            | 32.0<br>(25.0, 40.0)    | 286<br>(10.2)              | 1047<br>(37.4)  | 1328<br>(47.4)  | 139<br>(5.0)  | 1206<br>(43.1)  | 81<br>(2.9)     | 22.7<br>(18.4, 33.9)                                               | NA                                      | 457<br>(16.3)                   | NA               |
| LISAplus,<br>n=1,965                      | 32.0<br>(23.0, 40.0)    | 142<br>(7.2)               | 721<br>(36.7)   | 1089<br>(55.4)  | 13<br>(0.7)   | 855<br>(43.5)   | 7<br>(0.4)      | 21.7<br>(17.9, 32.8)                                               | NA                                      | 1143<br>(58.2)                  | 39<br>(2.0)      |
| LUKAS, n=441                              | 30.8<br>(21.2, 42.1)    | 21<br>(4.8)                | 334<br>(75.7)   | 86<br>(19.5)    | NA            | 151<br>(34.2)   | NA              | 24.1<br>(18.5, 36.4)                                               | 26.1<br>(20.1, 34.7)                    | NA                              | 441<br>(100.0)   |

**S2 Table. Cohort-specific description of available covariates (continued)**

| Cohort name,<br>number of<br>participants | Maternal<br>age (years) | Maternal educational level |                 |                 |               | Maternal parity  |                | Maternal<br>pre- or early<br>pregnancy<br>BMI (kg/m <sup>2</sup> ) | Paternal<br>BMI<br>(kg/m <sup>2</sup> ) | Maternal alcohol<br>consumption |                |
|-------------------------------------------|-------------------------|----------------------------|-----------------|-----------------|---------------|------------------|----------------|--------------------------------------------------------------------|-----------------------------------------|---------------------------------|----------------|
|                                           |                         | Low                        | Medium          | High            | Missing       | Nulliparous      | Missing        |                                                                    |                                         | Yes                             | Missing        |
| MoBa, n=80,116                            | 30.0<br>(21.0, 39.0)    | 25127<br>(31.4)            | 32959<br>(41.1) | 20428<br>(25.5) | 1602<br>(2.0) | 36477<br>(45.5)  | NA             | 23.1<br>(18.4, 34.9)                                               | 25.4<br>(20.5, 33.4)                    | 10259<br>(12.8)                 | 607<br>(0.8)   |
| NINFEA,<br>n=2,259 <sup>a</sup>           | 33.0<br>(25.0, 41.0)    | 92<br>(4.1)                | 774<br>(34.3)   | 1388<br>(61.4)  | 5<br>(0.2)    | 1519<br>(67.2)   | 2<br>(0.1)     | 21.5<br>(17.4, 32.0)                                               | 24.5<br>(19.7, 31.7)                    | 895<br>(39.6)                   | 5<br>(0.2)     |
| PÉLAGIE,<br>n=1,353                       | 30.2<br>(22.8, 39.6)    | 190<br>(14.0)              | 238<br>(17.6)   | 992<br>(68.1)   | 3<br>(0.2)    | 591<br>(43.7)    | 5<br>(0.4)     | 21.6<br>(17.7, 32.2)                                               | NA                                      | 202<br>(14.9)                   | 13<br>(1.0)    |
| Piccolipiù,<br>n=3,292                    | 34.0<br>(23.0, 42.0)    | 393<br>(11.9)              | 1415<br>(43.0)  | 1473<br>(44.7)  | 11<br>(0.3)   | 1916<br>(58.2)   | 8<br>(0.2)     | 21.7<br>(17.6, 33.0)                                               | 24.8<br>(20.2, 32.7)                    | 1452<br>(44.1)                  | 37<br>(1.1)    |
| PRIDE Study,<br>n=1,616                   | 30.0<br>(24.0, 38.0)    | 31<br>(1.9)                | 329<br>(20.4)   | 1219<br>(75.4)  | 37<br>(2.3)   | 973<br>(60.2)    | 5<br>(0.3)     | 22.6<br>(18.4, 33.5)                                               | 24.1<br>(19.4, 31.2)                    | 300<br>(18.6)                   | 219<br>(13.6)  |
| Project Viva,<br>n=2,001                  | 32.3<br>(19.5, 40.9)    | 662<br>(33.1)              | 724<br>(36.2)   | 603<br>(30.1)   | 12<br>(0.6)   | 959<br>(47.9)    | NA             | 23.4<br>(18.1, 39.2)                                               | 25.9<br>(20.0, 35.2)                    | 1245<br>(62.2)                  | 137<br>(6.8)   |
| REPRO_PL,<br>n=1,434                      | 28.0<br>(20.0, 37.0)    | 171<br>(11.9)              | 429<br>(29.9)   | 820<br>(57.2)   | 14<br>(1.0)   | 804<br>(56.1)    | 13<br>(0.9)    | 21.5<br>(17.3, 31.2)                                               | NA                                      | 116<br>(8.1)                    | 108<br>(7.5)   |
| RHEA, n=651                               | 30.0<br>(20.0, 40.0)    | 109<br>(16.7)              | 322<br>(49.5)   | 213<br>(32.7)   | 7<br>(1.1)    | NA               | 651<br>(100.0) | 23.4<br>(18.1, 36.1)                                               | 26.8<br>(21.2, 36.3)                    | 126<br>(19.4)                   | 201<br>(30.9)  |
| SCOPE<br>BASELINE,<br>n=1,216             | 31.0<br>(20.0, 39.0)    | NA                         | 162<br>(13.3)   | 1045<br>(85.9)  | 9<br>(0.7)    | 1216<br>(100.0)  | NA             | 23.9<br>(19.1, 34.9)                                               | 26.5<br>(20.9, 33.9)                    | 431<br>(35.4)                   | 36<br>(3.0)    |
| SWS, n=2,716                              | 30.2<br>(22.8, 36.3)    | 334<br>(12.3)              | 1594<br>(58.7)  | 782<br>(28.8)   | 6<br>(0.2)    | 1339<br>(49.3)   | 2<br>(0.1)     | 24.2<br>(18.9, 37.5)                                               | 25.5<br>(19.8, 34.1)                    | 2093<br>(77.1)                  | 254<br>(9.4)   |
| <b>Total group</b>                        | 30.0<br>(20.3, 39.2)    | 50120<br>(21.9)            | 88416<br>(38.6) | 86520<br>(37.8) | 4102<br>(1.8) | 110987<br>(48.4) | 3647<br>(1.6)  | 22.7<br>(18.1, 34.6)                                               | 25.1<br>(20.1, 33.1)                    | 59539<br>(26.0)                 | 22271<br>(9.7) |

Values are expressed as number of participants (%) or medians (95% range). BMI, body mass index.

<sup>a</sup>Subset of participants with follow-up completed at 4 years of child's age by the time of data transfer (March 2015).
