# Supplementary material for: Changes in parental smoking during pregnancy and risks of adverse birth outcomes and childhood overweight in Europe and North America: An individual participant data meta-analysis of 229,000 singleton births
Source: PubMed Central journal article supplement (PMC7433860; doi:10.1371/journal.pmed.1003182), 2020-08-18
Supplement: pmed.1003182.s007.pdf [file pmed.1003182.s007.pdf]

**S3 Table. Cohort-specific description of maternal smoking variables**

| Cohort name, number of participants | Maternal first trimester smoking |                 | Categories (cigarettes/day) |               |                | Maternal third trimester smoking |                 | Categories (cigarettes/day) |               |                |
|-------------------------------------|----------------------------------|-----------------|-----------------------------|---------------|----------------|----------------------------------|-----------------|-----------------------------|---------------|----------------|
|                                     | No                               | Yes             | <1-4                        | 5-9           | ≥10            | No                               | Yes             | <1-4                        | 5-9           | ≥10            |
| ABCD, n=7,324 <sup>a</sup>          | 5451<br>(90.8)                   | 550<br>(9.2)    | NA                          | NA            | NA             | 4439<br>(90.1)                   | 490<br>(9.9)    | 253<br>(3.6)                | 118<br>(1.7)  | 94<br>(1.3)    |
| ALSPAC, n=12,148                    | 9687<br>(79.7)                   | 2461<br>(20.3)  | 404<br>(3.4)                | 559<br>(4.7)  | 1473<br>(12.3) | 9581<br>(78.9)                   | 2567<br>(21.1)  | 498<br>(4.1)                | 622<br>(5.1)  | 1394<br>(11.5) |
| BAMSE, n=4,057                      | 3574<br>(88.1)                   | 483<br>(11.9)   | 100<br>(2.5)                | 114<br>(2.8)  | 267<br>(6.7)   | 3671<br>(90.5)                   | 386<br>(9.5)    | 109<br>(2.7)                | 87<br>(2.1)   | 188<br>(4.6)   |
| BIB, n=1,641                        | 1418<br>(86.4)                   | 223<br>(13.6)   | NA                          | NA            | NA             | NA                               | NA              | NA                          | NA            | NA             |
| Co.N.ER, n=641                      | 555<br>(86.6)                    | 86<br>(13.4)    | 48<br>(7.6)                 | 26<br>(4.1)   | 12<br>(1.9)    | 582<br>(90.8)                    | 59<br>(9.2)     | 29<br>(4.5)                 | 19<br>(3.0)   | 11<br>(1.7)    |
| DNBC, n=71,710                      | 59316<br>(82.7)                  | 12391<br>(17.3) | 2351<br>(3.3)               | 4103<br>(5.7) | 5896<br>(8.3)  | 55659<br>(81.4)                  | 12680<br>(18.6) | 1631<br>(2.3)               | 3885<br>(5.5) | 6066<br>(8.6)  |
| EDEN, n=1,880                       | 1397<br>(74.5)                   | 478<br>(25.5)   | 109<br>(5.8)                | 160<br>(8.6)  | 208<br>(11.2)  | 1544<br>(83.2)                   | 312<br>(16.8)   | 95<br>(5.1)                 | 111<br>(5.9)  | 98<br>(5.3)    |
| FCOU, n=4,003                       | 3647<br>(91.1)                   | 356<br>(8.9)    | 223<br>(5.6)                | 91<br>(2.3)   | 41<br>(1.0)    | 3647<br>(91.1)                   | 356<br>(8.9)    | 223<br>(5.6)                | 91<br>(2.3)   | 41<br>(1.0)    |
| GASPII, n=680                       | 603<br>(88.7)                    | 77<br>(11.3)    | 45<br>(6.7)                 | 16<br>(2.4)   | 16<br>(2.4)    | 627<br>(92.2)                    | 53<br>(7.8)     | 28<br>(4.1)                 | 14<br>(2.1)   | 11<br>(1.6)    |
| GENERATION R,<br>n=7,934            | 5662<br>(79.0)                   | 1503<br>(21.0)  | 799<br>(10.4)               | 401<br>(5.2)  | 303<br>(3.9)   | 5596<br>(84.6)                   | 1020<br>(15.4)  | 506<br>(6.5)                | 321<br>(4.1)  | 193<br>(2.5)   |
| GENERATION XXI,<br>n=7,541          | 5796<br>(76.9)                   | 1739<br>(23.1)  | NA                          | NA            | NA             | 6405<br>(85.0)                   | 1129<br>(15.0)  | NA                          | NA            | NA             |
| GENESIS, n=2,261                    | 1894<br>(83.8)                   | 367<br>(16.2)   | 150<br>(6.8)                | 116<br>(5.3)  | 100<br>(4.5)   | 1897<br>(83.9)                   | 364<br>(16.1)   | 158<br>(7.0)                | 114<br>(5.0)  | 92<br>(4.1)    |
| GINIplus, n=2,086                   | 1903<br>(91.8)                   | 171<br>(8.2)    | 40<br>(1.9)                 | 58<br>(2.8)   | 72<br>(3.5)    | 1903<br>(92.0)                   | 165<br>(8.0)    | 69<br>(3.3)                 | 59<br>(2.7)   | 38<br>(1.8)    |
| HUMIS, n=986                        | 935<br>(94.8)                    | 51<br>(5.2)     | 6<br>(0.6)                  | 18<br>(1.8)   | 22<br>(2.2)    | 759<br>(93.4)                    | 54<br>(6.6)     | 11<br>(1.1)                 | 17<br>(1.7)   | 16<br>(1.6)    |
| INMA, n=2,406                       | 1992<br>(82.8)                   | 414<br>(17.2)   | 127<br>(5.3)                | 116<br>(4.8)  | 166<br>(6.9)   | 1978<br>(82.6)                   | 418<br>(17.4)   | 169<br>(7.0)                | 149<br>(6.2)  | 100<br>(4.2)   |
| KOALA, n=2,800                      | 2616<br>(93.4)                   | 184<br>(6.6)    | 32<br>(1.2)                 | 82<br>(3.0)   | 70<br>(2.5)    | 2594<br>(92.6)                   | 206<br>(7.4)    | 42<br>(1.5)                 | 67<br>(2.4)   | 97<br>(3.5)    |
| LISAplus, n=1,965                   | 1713<br>(87.2)                   | 252<br>(12.8)   | 85<br>(4.4)                 | 73<br>(3.8)   | 90<br>(4.6)    | 1743<br>(91.6)                   | 160<br>(8.4)    | 54<br>(2.8)                 | 53<br>(2.7)   | 47<br>(2.4)    |
| LUKAS, n=441                        | 371<br>(84.1)                    | 70<br>(15.8)    | NA                          | NA            | NA             | 407<br>(92.3)                    | 34<br>(7.7)     | NA                          | NA            | NA             |
| MoBa, n=80,116 <sup>a</sup>         | 72315<br>(91.1)                  | 7090<br>(8.9)   | NA                          | NA            | NA             | 51108<br>(92.0)                  | 4428<br>(8.0)   | 1970<br>(2.5)               | 1327<br>(1.7) | 1084<br>(1.4)  |
| NINFEA, n=2,259 <sup>b</sup>        | 2092<br>(92.6)                   | 167<br>(7.4)    | NA                          | NA            | NA             | 2129<br>(94.7)                   | 120<br>(5.3)    | NA                          | NA            | NA             |
| PÉLAGIE, n=1,494                    | 1025<br>(75.8)                   | 328<br>(24.2)   | 119<br>(8.8)                | 108<br>(8.0)  | 97<br>(7.2)    | 1160<br>(89.2)                   | 140<br>(10.8)   | 72<br>(6.2)                 | 47<br>(4.1)   | 15<br>(1.3)    |
| Piccolipiù, n=3,292                 | 2584<br>(78.5)                   | 707<br>(21.5)   | 458<br>(14.0)               | 156<br>(4.8)  | 93<br>(2.8)    | 2983<br>(90.6)                   | 308<br>(9.4)    | 177<br>(5.4)                | 81<br>(2.5)   | 46<br>(1.4)    |
| PRIDE Study, n=1,616                | 1531<br>(94.9)                   | 82<br>(5.1)     | 40<br>(2.5)                 | 22<br>(1.4)   | 19<br>(1.2)    | 1402<br>(97.1)                   | 42<br>(2.9)     | 17<br>(1.1)                 | 11<br>(0.7)   | 9<br>(0.6)     |
| Project Viva, n=2,001               | 1744<br>(90.1)                   | 192<br>(9.9)    | NA                          | NA            | NA             | 1880<br>(96.4)                   | 70<br>(3.6)     | NA                          | NA            | NA             |
| REPRO_PL, n=1,434                   | 1224<br>(85.7)                   | 205<br>(14.3)   | 52<br>(3.8)                 | 57<br>(4.1)   | 58<br>(4.2)    | 1296<br>(92.0)                   | 113<br>(8.0)    | 34<br>(2.4)                 | 36<br>(2.5)   | 36<br>(2.5)    |
| RHEA, n=651                         | 545<br>(84.5)                    | 100<br>(15.5)   | 29<br>(4.7)                 | 23<br>(3.7)   | 23<br>(3.7)    | NA                               | NA              | NA                          | NA            | NA             |
| SCOPE BASELINE,<br>n=1,216          | 1079<br>(88.7)                   | 137<br>(11.3)   | 63<br>(5.2)                 | 40<br>(3.3)   | 24<br>(2.0)    | NA                               | NA              | NA                          | NA            | NA             |
| SWS, n=2,716                        | 2350                             | 358             | 61                          | 102           | 195            | 2155                             | 400             | 75                          | 96            | 228            |

|                    |        |        |       |       |       |        |        |       |       |       |
|--------------------|--------|--------|-------|-------|-------|--------|--------|-------|-------|-------|
|                    | (86.8) | (13.2) | (2.3) | (3.8) | (7.3) | (84.3) | (15.7) | (2.8) | (3.5) | (8.4) |
| <b>Total group</b> | 117253 | 23582  | 5341  | 6441  | 9245  | 167145 | 26074  | 6220  | 7322  | 9904  |
|                    | (83.3) | (16.7) | (2.5) | (3.0) | (4.3) | (86.5) | (13.5) | (2.8) | (3.3) | (4.4) |

Values are expressed as number of participants (valid %). NA, not available or not applicable. Maternal first trimester smoking refers to all maternal smoking in first trimester no matter if mothers stop or continue smoking after first trimester.

<sup>a</sup>Numbers of smoking (no/yes) in first trimester are second trimester smoking numbers. To prevent exclusion due to no information on first trimester smoking, nonsmokers from second trimester were used as nonsmoking during pregnancy (ABCD and MoBa).

<sup>b</sup>Subset of participants with follow-up completed at 4 years of child's age by the time of data transfer (March 2015). Data on number of cigarettes/day smoked in pregnancy were not used for this manuscript.
