# Supplementary material for: Changes in parental smoking during pregnancy and risks of adverse birth outcomes and childhood overweight in Europe and North America: An individual participant data meta-analysis of 229,000 singleton births
Source: PubMed Central journal article supplement (PMC7433860; doi:10.1371/journal.pmed.1003182), 2020-08-18
Supplement: pmed.1003182.s009.pdf [file pmed.1003182.s009.pdf]

**S5 Table. Change in maternal smoking habits during pregnancy, gestational age at birth, birth weight and childhood BMI**

|                                                               | Gestational age at birth in weeks (95% Confidence Interval) | Gestational age-adjusted birth weight SDS (95% Confidence Interval) | Childhood BMI SDS (95% Confidence Interval) |
|---------------------------------------------------------------|-------------------------------------------------------------|---------------------------------------------------------------------|---------------------------------------------|
| <b>No maternal smoking in first trimester</b>                 |                                                             |                                                                     |                                             |
| Third trimester no smoking                                    | <i>Reference</i><br>n=100634                                | <i>Reference</i><br>n=103740                                        | <i>Reference</i><br>n=59070                 |
| Third trimester ≤4 cigarettes/day                             | -0.04 (-0.28, 0.16)<br>n=278                                | -0.10 (-0.22, 0.01)<br>n=274                                        | 0.25 (0.09, 0.42)*<br>n=147                 |
| Third trimester 5-9 cigarettes/day                            | 0.07 (-0.25, 0.39)<br>n=104                                 | -0.28 (-0.46, -0.09)*<br>n=103                                      | 0.18 (-0.09, 0.46)<br>n=51                  |
| Third trimester ≥10 cigarettes/day                            | 0.03 (-0.34, 0.40)<br>n=80                                  | -0.35 (-0.56, -0.14)*<br>n=79                                       | 0.19 (-0.16, 0.54)<br>n=31                  |
| <b>Maternal smoking in first trimester ≤4 cigarettes/day</b>  |                                                             |                                                                     |                                             |
| Third trimester quit                                          | 0.09 (-0.03, 0.20)<br>n=862                                 | -0.01 (-0.08, 0.06)<br>n=859                                        | 0.01 (-0.09, 0.11)<br>n=388                 |
| Third trimester ≤4 cigarettes/day                             | 0.02 (-0.05, 0.09)<br>n=2261                                | -0.23 (-0.27, -0.20)**<br>n=2457                                    | 0.17 (0.11, 0.23)**<br>n=1169               |
| Third trimester 5-9 cigarettes/day                            | -0.10 (-0.21, 0.02)<br>n=885                                | -0.40 (-0.46, -0.33)**<br>n=880                                     | 0.26 (0.16, 0.35)**<br>n=440                |
| Third trimester ≥10 cigarettes/day                            | -0.21 (-0.46, 0.03)<br>n=186                                | -0.46 (-0.60, -0.32)**<br>n=185                                     | 0.20 (-0.01, 0.41)<br>n=86                  |
| <b>Maternal smoking in first trimester 5-9 cigarettes/day</b> |                                                             |                                                                     |                                             |
| Third trimester quit                                          | 0.04 (-0.16, 0.23)<br>n=304                                 | -0.06 (-0.17, 0.05)<br>n=304                                        | 0.06 (-0.09, 0.22)<br>n=165                 |
| Third trimester ≤4 cigarettes/day                             | 0.03 (-0.10, 0.16)<br>n=657                                 | -0.28 (-0.36, -0.21)**<br>n=654                                     | 0.21 (0.10, 0.33)**<br>n=307                |
| Third trimester 5-9 cigarettes/day                            | -0.05 (-0.11, 0.01)<br>n=3551                               | -0.42 (-0.45, -0.39)**<br>n=3617                                    | 0.17 (0.12, 0.22)**<br>n=1704               |
| Third trimester ≥10 cigarettes/day                            | -0.10 (-0.20, -0.01)*<br>n=1330                             | -0.51 (-0.56, -0.46)**<br>n=1319                                    | 0.20 (0.13, 0.28)**<br>n=632                |
| <b>Maternal smoking in first trimester ≥10 cigarettes/day</b> |                                                             |                                                                     |                                             |
| Third trimester quit                                          | 0.02 (-0.18, 0.22)<br>n=285                                 | 0.03 (-0.08, 0.14)<br>n=283                                         | 0.13 (-0.02, 0.27)<br>n=194                 |
| Third trimester ≤4 cigarettes/day                             | -0.05 (-0.22, 0.13)<br>n=358                                | -0.24 (-0.34, -0.14)*<br>n=354                                      | 0.16 (0.01, 0.30)*<br>n=192                 |
| Third trimester 5-9 cigarettes/day                            | -0.12 (-0.22, -0.02)*                                       | -0.51 (-0.57, -0.45)**                                              | 0.18 (0.09, 0.27)**                         |

---

|                                          |                        |                       |                     |
|------------------------------------------|------------------------|-----------------------|---------------------|
|                                          | n=1078                 | n=1072                | n=503               |
| Third trimester $\geq$ 10 cigarettes/day | -0.15 (-0.20, -0.11)** | -0.55 (-0.58, 0.53)** | 0.25 (0.22, 0.07)** |

---

Values are beta's (95% confidence intervals) from multilevel linear mixed effects models that reflect the differences in gestational age at birth in weeks, gestational age-adjusted birth weight in standard deviation scores and childhood BMI in standard deviation scores per smoking group compared with the reference group (non-smoking in first and third trimester). Models are adjusted for maternal age, educational level, parity, pre-pregnancy body mass index, alcohol consumption during pregnancy and paternal smoking. \*P-value<0.05; \*\*P-value<0.001. BMI, body mass index; SDS, standard deviation score.
