# Supplementary material for: Changes in parental smoking during pregnancy and risks of adverse birth outcomes and childhood overweight in Europe and North America: An individual participant data meta-analysis of 229,000 singleton births
Source: PubMed Central journal article supplement (PMC7433860; doi:10.1371/journal.pmed.1003182), 2020-08-18
Supplement: pmed.1003182.s013.pdf [file pmed.1003182.s013.pdf]

**S9 Table. Contact information for data requests per cohort**

| <b>Cohort name (country)</b>   | <b>Contact for data requests</b>                                                                        | <b>Local institutional ethical review boards</b>                                                                                                                                                               |
|--------------------------------|---------------------------------------------------------------------------------------------------------|----------------------------------------------------------------------------------------------------------------------------------------------------------------------------------------------------------------|
| ABCD (The Netherlands)         | abcd@amc.nl                                                                                             | Central Committee on Research Involving Human Subjects in The Netherlands, the medical ethics review committees of the participating hospitals and the Registration Committee of the Municipality of Amsterdam |
| ALSPAC (United Kingdom)        | <a href="http://www.bristol.ac.uk/alspac/researchers/">http://www.bristol.ac.uk/alspac/researchers/</a> | ALSPAC Ethics and Law Committee and Local Research Ethics Committees                                                                                                                                           |
| BAMSE (Sweden)                 | bamse-projekt@imm.ki.se                                                                                 | Regional ethical review board in Stockholm (application numbers 2010/1474- 31/3 and 2013/1879- 32).                                                                                                            |
| BIB (United Kingdom)           | borninbradford@bthft.nhs.uk                                                                             | Bradford Research Ethics Committee                                                                                                                                                                             |
| Co.N.ER (Italy)                | simona.rosa@unibo.it                                                                                    | Ethics Committee of the S. Orsola-Malpighi Teaching Hospital of Bologna (Italy) (052/2004/U/Tess)                                                                                                              |
| DNBC (Denmark)                 | dnbc-research@ssi.dk                                                                                    | The Scientific Ethic Committee in Denmark, the Danish Data Protection Agency, and the DNBC Steering Committee                                                                                                  |
| EDEN (France)                  | etude.eden@inserm.fr                                                                                    | Ethics Committee of the Bicêtre Hospital                                                                                                                                                                       |
| FCOU (Ukraine)                 | zoreslava7@ukr.net                                                                                      | Institutional Review Boards at the University of Illinois at Chicago and the Ukrainian Institute for Pediatrics, Obstetrics, and Gynecology                                                                    |
| GASPII (Italy)                 | p.lorusso@deplazio.it                                                                                   | Ethical Committee of the Università Cattolica del Sacro Cuore, Rome                                                                                                                                            |
| Generation R (The Netherlands) | generationr@erasmusmc.nl                                                                                | Medical Ethical Committee of the Erasmus Medical Center, Rotterdam                                                                                                                                             |
| Generation XXI (Portugal)      | gxxi@med.up.pt                                                                                          | Ethics Committee of Hospital de S. João                                                                                                                                                                        |
| GENESIS (Greece)               | oandrou@hua.gr                                                                                          | Ethical Committee of Harokopio University of Athens and all municipalities invited to participate in the study                                                                                                 |
| GINIplus (Germany)             | maike.ferland@helmholtz-muenchen.de                                                                     | Bavarian General Medical Council, University of Leipzig, Medical Council of North-Rhine-Westphalia                                                                                                             |
| HUMIS (Norway)                 | ingunn.brandt@fhi.no                                                                                    | Regional Ethics Committee for Medical Research in Norway (reference S-02122) and Norwegian Data Inspectorate                                                                                                   |
| INMA (Spain)                   | inma@proyectoimna.org                                                                                   | The Municipal Institute of Sanitary Assistance of Barcelona, La Fe University Hospital of Valencia, The Donostia Hospital, and Ib-salut                                                                        |
| KOALA (The Netherlands)        | datahub@maastrichtuniversity.nl                                                                         | Medical ethics committee of the Maastricht University/University Hospital of Maastricht                                                                                                                        |
| LISApplus (Germany)            | maike.ferland@helmholtz-muenchen.de                                                                     | Bavarian General Medical Council, University of Leipzig, Medical Council of North-Rhine-Westphalia                                                                                                             |
| LUKAS (Finland)                | pirkka.kirjavainen@thl.fi                                                                               | Research Ethics Committee, Hospital District of Northern Savo, Kuopio, Finland                                                                                                                                 |
| MoBa (Norway)                  | datatilgang@fhi.no                                                                                      | Norwegian Data Inspectorate and the Regional Ethics Committee for Medical Research                                                                                                                             |
| NINFEA (Italy)                 | info@progettoninfea.it                                                                                  | Ethical Committee of the San Giovanni Battista Hospital and CTO/CRF/Maria Adelaide Hospital of Turin (approval N.0048362 and following amendments)                                                             |
| PÉLAGIE (France)               | pelagie.rennes@inserm.fr                                                                                | French Consulting Committee for the Treatment of Information in Medical Research (no. 09.485) and the French National Commission for the Confidentiality of Computerised Data (no. 909347)                     |

|                               |                                         |                                                                                                                                                                           |
|-------------------------------|-----------------------------------------|---------------------------------------------------------------------------------------------------------------------------------------------------------------------------|
| Piccolipiù (Italy)            | piccolipiuroma@deplazio.it              | Ethics committees of the Local Health Unit Roma E (management centre), of the Istituto Superiore di Sanità (National Institute of Public Health) and of each local centre |
| PRIDE Study (The Netherlands) | info@pridestudy.nl                      | Regional Committee on Research involving Human Subjects                                                                                                                   |
| Project Viva (United States)  | project_viva@hphc.org                   | Institutional Review Board of Harvard Pilgrim Health Care                                                                                                                 |
| REPRO_PL (Poland)             | imp@imp.lodz.pl                         | Ethical Committee of the Nofer Institute of Occupational Medicine, Łódź, Poland (Decision No. 7/2007)                                                                     |
| RHEA (Greece)                 | kliniki.diatrofis@med.uoc.gr            | Ethical Committee of the University Hospital, Scientific Council, Heraklion, Crete, Greece                                                                                |
| SCOPE BASELINE (Ireland)      | epvchls@liverpool.ac.uk baseline@ucc.ie | Clinical Research Ethics Committee of the Cork Teaching Hospitals, [ref ECM5(9) 01/07/2008]                                                                               |
| SWS (United Kingdom)          | sws@mrc.soton.ac.uk                     | Southampton and South West Hampshire Local Research Ethics Committee (06/Q1702/104)                                                                                       |
